# Supplementary material for: The P2X3 receptor antagonist filapixant in patients with refractory chronic cough: a randomized controlled trial
Source: PubMed Central journal article supplement (PMC10088222; doi:10.1186/s12931-023-02384-8), 2023-04-11
Supplement: 12931_2023_2384_MOESM3_ESM.pdf [file 12931_2023_2384_MOESM3_ESM.pdf]

C. Friedrich, K. Francke, S. S. Birring, J. W. K. van den Berg, P. A. Marsden, L. McGarvey, A. M. Turner, P. Wielders, I. Gashaw, S. Klein, A. Morice

## **The P2X3 receptor antagonist filapixant in patients with refractory chronic cough – a randomized trial**

*Respiratory Research 2023*

### **Additional File 3**

## **Supplemental tables and figures**

#### **Table of supplemental tables**

|                                                                                                                              |   |
|------------------------------------------------------------------------------------------------------------------------------|---|
| Table S 1: 24-h cough monitoring: Cough count [1/hour].....                                                                  | 2 |
| Table S 2: 24-h cough frequency: Subgroup analyses by baseline cough count (Bayesian mixed model).....                       | 2 |
| Table S 3: 24-h cough frequency: Responder rates for different change thresholds.....                                        | 3 |
| Table S 4: VAS cough severity: Responder rates .....                                                                         | 3 |
| Table S 5: Treatment-emergent adverse events observed in >5% of patients.....                                                | 4 |
| Table S 6: Cough frequency: Subgroup analyses by occurrence of taste-related adverse events (Bayesian mixed model).....      | 5 |
| Table S 7: Cough severity (VAS): Subgroup analyses by occurrence of taste-related adverse events (Bayesian mixed model)..... | 6 |

#### **Table of supplemental figures**

|                                                                                                              |   |
|--------------------------------------------------------------------------------------------------------------|---|
| Figure S 1: Plasma concentration-time curves for filapixant (BAY1902607) after multiple administrations..... | 7 |
|--------------------------------------------------------------------------------------------------------------|---|

**Table S 1: 24-h cough monitoring: Cough count [1/hour]**

|                           | Complete 24-h interval            |  | Awake phases                      |  |
|---------------------------|-----------------------------------|--|-----------------------------------|--|
|                           | Geom. Mean / %CV (Range)          |  | Geom. Mean / %CV (Range)          |  |
| <b>Active drug period</b> |                                   |  |                                   |  |
| Baseline                  | 27.2 / 181 (0.6-581)              |  | 36.0 / 194 (0.8-766)              |  |
| 20 mg filapixant          | 26.1 / 193 (0.4-521)              |  | 34.5 / 214 (0.6-740)              |  |
| 80 mg filapixant          | 21.0 / 213 (0.3-645)              |  | 28.0 / 219 (0.5-875)              |  |
| 150 mg filapixant         | 18.4 / 207 (0.9-713)              |  | 23.8 / 216 (1.1-931)              |  |
| 250 mg filapixant         | 16.0 / 233 (0.5-600)              |  | 20.5 / 242 (0.7-832)              |  |
| <b>Placebo period</b>     |                                   |  |                                   |  |
| Baseline                  | 24.6 / 151 (0.7-513)              |  | 32.5 / 159 (1.0-745)              |  |
| PLC4                      | 23.3 / 181 (0.4-671)              |  | 31.0 / 181 (0.6-794)              |  |
| PLC11                     | 24.4 / 156 (1.5-806)              |  | 32.4 / 153 (2.1-1020)             |  |
| PLC18                     | 22.6 / 177 (0.4-720) <sup>a</sup> |  | 31.6 / 177 (0.6-903) <sup>a</sup> |  |
| PLC25                     | 21.4 / 171 (0.3-686)              |  | 27.8 / 181 (0.5-993)              |  |

%CV, coefficient of variation [%]; PLC4, placebo given from Day 0 to Day 3; PLC11, placebo given from Day 7 to Day 10; PLC18; placebo given from Day 14 to Day 17; PLC25, placebo given from Day 21 to Day 24. <sup>a</sup> Number of evaluable patients = 22. Total number of patients = 23.

**Table S 2: 24-h cough frequency: Subgroup analyses by baseline cough count (Bayesian mixed model)**

| Baseline cough count                     | Dose    | Comparison with baseline |                       |                         |         | Comparison with placebo |                      |                         |         |
|------------------------------------------|---------|--------------------------|-----------------------|-------------------------|---------|-------------------------|----------------------|-------------------------|---------|
|                                          |         | %-change                 | Ratio to baseline [%] | 90% credible limits [%] | P-value | %-difference            | Ratio to placebo [%] | 90% credible limits [%] | P-value |
| <b>A</b><br>Cough frequency ≥5/h (N=22)  | Placebo | -6.3                     | 93.7                  | (80.7; 109)             | 0.235   | --                      | --                   | --                      | --      |
|                                          | 20 mg   | -3.1                     | 96.9                  | (80.9; 117)             | 0.389   | 3.9                     | 104                  | (89.6; 120)             | 0.666   |
|                                          | 80 mg   | -22.3                    | 77.7                  | (64.7; 93.3)            | 0.013   | -17.0                   | 83.0                 | (71.8; 95.8)            | 0.017   |
|                                          | 150 mg  | -33.7                    | 66.3                  | (55.2; 80.0)            | 0.000   | -29.1                   | 70.9                 | (61.0; 81.9)            | <0.001  |
|                                          | 250 mg  | -41.9                    | 58.1                  | (48.3; 69.9)            | <0.001  | -37.9                   | 62.1                 | (53.5; 71.8)            | <0.001  |
| <b>B</b><br>Cough frequency ≥15/h (N=18) | Placebo | -8.1                     | 91.9                  | (77.7; 108)             | 0.190   | --                      | --                   | --                      | --      |
|                                          | 20 mg   | -3.7                     | 96.3                  | (78.7; 119)             | 0.381   | 5.1                     | 105                  | (89.0; 124)             | 0.695   |
|                                          | 80 mg   | -28.0                    | 72.0                  | (58.7; 88.3)            | 0.006   | -21.5                   | 78.5                 | (66.6; 92.4)            | 0.008   |
|                                          | 150 mg  | -36.3                    | 63.7                  | (52.0; 78.3)            | 0.000   | -30.5                   | 69.5                 | (58.7; 81.8)            | <0.001  |
|                                          | 250 mg  | -45.9                    | 54.1                  | (44.0; 66.6)            | <0.001  | -41.1                   | 58.9                 | (50.0; 69.6)            | <0.001  |
| <b>C</b><br>Cough frequency ≥30/h (N=11) | Placebo | -7.2                     | 92.8                  | (70.8; 118)             | 0.291   | --                      | --                   | --                      | --      |
|                                          | 20 mg   | 0.7                      | 101                   | (73.7; 137)             | 0.516   | 9.1                     | 109                  | (86.2; 139)             | 0.736   |
|                                          | 80 mg   | -20.4                    | 79.6                  | (58.4; 108)             | 0.104   | -13.9                   | 86.1                 | (67.9; 109)             | 0.147   |
|                                          | 150 mg  | -32.1                    | 67.9                  | (50.0; 92.2)            | 0.020   | -26.4                   | 73.7                 | (57.7; 93.3)            | 0.016   |
|                                          | 250 mg  | -38.4                    | 61.6                  | (45.5; 83.8)            | 0.007   | -33.2                   | 66.8                 | (52.6; 84.7)            | 0.004   |

Total number of patients = 23.

**Table S 3: 24-h cough frequency: Responder rates for different change thresholds**

|                           | >30% reduction from baseline |                     | >50% reduction from baseline |                     | >55% reduction from baseline <sup>a</sup> |                     | Total       |
|---------------------------|------------------------------|---------------------|------------------------------|---------------------|-------------------------------------------|---------------------|-------------|
|                           | N of responders              | N of non-responders | N of responders              | N of non-responders | N of responders                           | N of non-responders |             |
| <b>Active drug period</b> |                              |                     |                              |                     |                                           |                     |             |
| 20 mg filapixant          | 2 (8.7%)                     | 21 (91.3%)          | 0 (0.0%)                     | 23 (100.0%)         | 0 (0 %)                                   | 23 (100 %)          | 23 (100.0%) |
| 80 mg filapixant          | 9 (39.1%)                    | 14 (60.9%)          | 4 (17.4%)                    | 19 (82.6%)          | 2 (8.7 %)                                 | 21 (91.3 %)         | 23 (100.0%) |
| 150 mg filapixant         | 11 (47.8%)                   | 12 (52.2%)          | 8 (34.8%)                    | 15 (65.2%)          | 6 (26.1 %)                                | 17 (73.9 %)         | 23 (100.0%) |
| 250 mg filapixant         | 12 (52.2%)                   | 11 (47.8%)          | 8 (34.8%)                    | 15 (65.2%)          | 7 (30.4 %)                                | 16 (69.6 %)         | 23 (100.0%) |
| <b>Placebo period</b>     |                              |                     |                              |                     |                                           |                     |             |
| PLC4                      | 2 (8.7%)                     | 20 (87.0%)          | 0                            | 22 (95.7%)          | 0 (0 %)                                   | 22 (100 %)          | 22 (95.7%)  |
| PLC11                     | 2 (8.7%)                     | 20 (87.0%)          | 1 (4.3%)                     | 21 (91.3%)          | 1 (4.5 %)                                 | 21 (95.5 %)         | 22 (95.7%)  |
| PLC18                     | 5 (21.7%)                    | 16 (69.6%)          | 0                            | 21 (91.3%)          | 0 (0 %)                                   | 21 (100 %)          | 21 (91.3%)  |
| PLC25                     | 6 (26.1%)                    | 16 (69.6%)          | 2 (8.7%)                     | 20 (87.0%)          | 1 (4.5 %)                                 | 21 (95.5 %)         | 22 (95.7%)  |

N = number; PLC4, placebo given from Day 0 to Day 3; PLC11, placebo given from Day 7 to Day 10; PLC18; placebo given from Day 14 to Day 17; PLC25, placebo given from Day 21 to Day 24. Total number of patients = 23.

<sup>a</sup> post hoc analysis

**Table S 4: VAS cough severity: Responder rates**

|                           | >30 mm reduction from baseline <sup>a</sup> |                          | Total       |
|---------------------------|---------------------------------------------|--------------------------|-------------|
|                           | Number of responders                        | Number of non-responders |             |
| <b>Active drug period</b> |                                             |                          |             |
| 20 mg filapixant          | 3 (13.0%)                                   | 20 (87.0%)               | 23 (100.0%) |
| 80 mg filapixant          | 8 (34.8%)                                   | 15 (65.2%)               | 23 (100.0%) |
| 150 mg filapixant         | 7 (30.4%)                                   | 16 (69.6%)               | 23 (100.0%) |
| 250 mg filapixant         | 8 (34.8%)                                   | 15 (65.2%)               | 23 (100.0%) |
| <b>Placebo period</b>     |                                             |                          |             |
| PLC4                      | 1 (4.3%)                                    | 22 (95.7%)               | 23 (100.0%) |
| PLC11                     | 2 (8.7%)                                    | 21 (91.3%)               | 23 (100.0%) |
| PLC18                     | 2 (9.1%)                                    | 20 (90.9%)               | 22 (95.7%)  |
| PLC25                     | 4 (17.4%)                                   | 19 (82.6%)               | 23 (100.0%) |

PLC4, placebo given from Day 0 to Day 3; PLC11, placebo given from Day 7 to Day 10; PLC18; placebo given from Day 14 to Day 17; PLC25, placebo given from Day 21 to Day 24. Total number of patients = 23.

<sup>a</sup> post hoc analysis

**Table S 5: Treatment-emergent adverse events observed in >5% of patients**

| <b>MedDRA v22.0</b>                                         |                  |                  |                   |                   |               |              |              |              |               |
|-------------------------------------------------------------|------------------|------------------|-------------------|-------------------|---------------|--------------|--------------|--------------|---------------|
| <b>Primary system organ class</b>                           | <b>20 mg BAY</b> | <b>80 mg BAY</b> | <b>150 mg BAY</b> | <b>250 mg BAY</b> | <b>PLC4</b>   | <b>PLC11</b> | <b>PLC18</b> | <b>PLC25</b> | <b>Total</b>  |
| <b>Preferred term</b>                                       | <b>N (%)</b>     | <b>N (%)</b>     | <b>N (%)</b>      | <b>N (%)</b>      | <b>N (%)</b>  | <b>N (%)</b> | <b>N (%)</b> | <b>N (%)</b> | <b>N (%)</b>  |
| <b>Patients with any AE</b>                                 | 11<br>(47.8%)    | 9<br>(39.1%)     | 11 (47.8%)        | 13 (56.5%)        | 10<br>(43.5%) | 9<br>(39.1%) | 7<br>(30.4%) | 8<br>(34.8%) | 22<br>(95.7%) |
| <b>Gastrointestinal disorders</b>                           | 3 (13.0%)        | 5 (21.7%)        | 5 (21.7%)         | 5 (21.7%)         | 2 (8.7%)      | 5 (21.7%)    | 2 (8.7%)     | 1 (4.3%)     | 16 (69.6%)    |
| Abdominal pain upper                                        | 0                | 1 (4.3%)         | 0                 | 0                 | 0             | 0            | 0            | 1 (4.3%)     | 2 (8.7%)      |
| Diarrhoea                                                   | 1 (4.3%)         | 0                | 0                 | 1 (4.3%)          | 0             | 0            | 1 (4.3%)     | 0            | 3 (13.0%)     |
| Dry mouth                                                   | 0                | 0                | 1 (4.3%)          | 1 (4.3%)          | 0             | 0            | 1 (4.3%)     | 0            | 3 (13.0%)     |
| Glossodynia                                                 | 0                | 1 (4.3%)         | 0                 | 1 (4.3%)          | 0             | 0            | 0            | 0            | 2 (8.7%)      |
| Nausea                                                      | 2 (8.7%)         | 0                | 1 (4.3%)          | 0                 | 2 (8.7%)      | 2 (8.7%)     | 0            | 0            | 5 (21.7%)     |
| Paraesthesia oral                                           | 0                | 1 (4.3%)         | 1 (4.3%)          | 1 (4.3%)          | 0             | 0            | 0            | 0            | 2 (8.7%)      |
| Vomiting                                                    | 0                | 1 (4.3%)         | 2 (8.7%)          | 0                 | 0             | 1 (4.3%)     | 0            | 1 (4.3%)     | 3 (13.0%)     |
| <b>General disorders and administration site conditions</b> | 2 (8.7%)         | 1 (4.3%)         | 1 (4.3%)          | 0                 | 0             | 0            | 1 (4.3%)     | 1 (4.3%)     | 4 (17.4%)     |
| Fatigue                                                     | 0                | 1 (4.3%)         | 1 (4.3%)          | 0                 | 0             | 0            | 0            | 0            | 2 (8.7%)      |
| <b>Injury, poisoning and procedural complications</b>       | 1 (4.3%)         | 1 (4.3%)         | 0                 | 0                 | 0             | 0            | 0            | 0            | 2 (8.7%)      |
| Contusion                                                   | 1 (4.3%)         | 1 (4.3%)         | 0                 | 0                 | 0             | 0            | 0            | 0            | 2 (8.7%)      |
| Investigations                                              | 0                | 0                | 0                 | 0                 | 1 (4.3%)      | 1 (4.3%)     | 1 (4.3%)     | 0            | 2 (8.7%)      |
| <b>Musculoskeletal and connective tissue disorders</b>      | 0                | 1 (4.3%)         | 0                 | 1 (4.3%)          | 1 (4.3%)      | 0            | 0            | 3 (13.0%)    | 5 (21.7%)     |
| Arthralgia                                                  | 0                | 0                | 0                 | 0                 | 0             | 0            | 0            | 2 (8.7%)     | 2 (8.7%)      |
| <b>Nervous system disorders</b>                             | 4 (17.4%)        | 4 (17.4%)        | 8 (34.8%)         | 9 (39.1%)         | 5 (21.7%)     | 3 (13.0%)    | 4 (17.4%)    | 2 (8.7%)     | 18 (78.3%)    |
| Ageusia                                                     | 0                | 1 (4.3%)         | 1 (4.3%)          | 0                 | 0             | 0            | 0            | 0            | 2 (8.7%)      |
| Dizziness                                                   | 0                | 1 (4.3%)         | 1 (4.3%)          | 0                 | 1 (4.3%)      | 1 (4.3%)     | 0            | 0            | 3 (13.0%)     |
| Dysgeusia                                                   | 1 (4.3%)         | 0                | 3 (13.0%)         | 5 (21.7%)         | 0             | 0            | 2 (8.7%)     | 0            | 8 (34.8%)     |
| Headache                                                    | 1 (4.3%)         | 1 (4.3%)         | 2 (8.7%)          | 2 (8.7%)          | 4 (17.4%)     | 2 (8.7%)     | 2 (8.7%)     | 2 (8.7%)     | 8 (34.8%)     |
| Lethargy                                                    | 1 (4.3%)         | 0                | 0                 | 0                 | 0             | 1 (4.3%)     | 0            | 0            | 2 (8.7%)      |
| Hypogeusia                                                  | 0                | 1 (4.3%)         | 1 (4.3%)          | 1 (4.3%)          | 0             | 0            | 0            | 0            | 3 (13.0%)     |
| Taste disorder NOS                                          | 0                | 1 (4.3%)         | 4 (17.4%)         | 1 (4.3%)          | 1 (4.3%)      | 0            | 0            | 0            | 6 (26.1%)     |
| <b>Respiratory, thoracic and mediastinal disorders</b>      | 0                | 0                | 2 (8.7%)          | 1 (4.3%)          | 0             | 0            | 1 (4.3%)     | 2 (8.7%)     | 3 (13.0%)     |
| Cough                                                       | 0                | 0                | 2 (8.7%)          | 1 (4.3%)          | 0             | 0            | 1 (4.3%)     | 1 (4.3%)     | 3 (13.0%)     |
| <b>Skin and subcutaneous tissue disorders</b>               | 0                | 0                | 1 (4.3%)          | 1 (4.3%)          | 1 (4.3%)      | 1 (4.3%)     | 0            | 1 (4.3%)     | 4 (17.4%)     |
| Pruritus                                                    | 0                | 0                | 1 (4.3%)          | 0                 | 1 (4.3%)      | 0            | 0            | 0            | 2 (8.7%)      |
| Vascular disorders                                          | 1 (4.3%)         | 2 (8.7%)         | 0                 | 0                 | 2 (8.7%)      | 0            | 0            | 0            | 4 (17.4%)     |
| Haematoma                                                   | 1 (4.3%)         | 1 (4.3%)         | 0                 | 0                 | 2 (8.7%)      | 0            | 0            | 0            | 3 (13.0%)     |

Percentages refer to the total number of patients (N=23). Taste-related AEs are highlighted with grey shading.

AE, adverse event; BAY, filipixant; N, numbers of patients; NOS, no other specification; PLC4, placebo given from Day 0 to Day 3; PLC11, placebo given from Day 7 to Day 10; PLC18; placebo given from Day 14 to Day 17; PLC25, placebo given from Day 21 to Day 24. Total number of patients = 23.

**Table S 6: Cough frequency: Subgroup analyses by occurrence of taste-related adverse events (Bayesian mixed model)**

|          | Dose                                                      | Comparison with baseline |                     | Comparison with placebo |                     |              |
|----------|-----------------------------------------------------------|--------------------------|---------------------|-------------------------|---------------------|--------------|
|          |                                                           | Ratio to baseline        | 90% credible limits | Ratio to placebo        | 90% credible limits |              |
| <b>A</b> | <b>With any taste-related AE(s)</b> (N=13)                | Placebo                  | 0.90                | (0.77; 1.05)            | --                  | --           |
|          | 20 mg                                                     |                          | 1.00                | (0.82; 1.22)            | 1.11                | (0.93; 1.33) |
|          | 80 mg                                                     |                          | 0.68                | (0.56; 0.83)            | 0.75                | (0.63; 0.90) |
|          | 150 mg                                                    |                          | 0.50                | (0.41; 0.62)            | 0.56                | (0.46; 0.67) |
|          | 250 mg                                                    |                          | 0.40                | (0.32; 0.48)            | 0.44                | (0.37; 0.53) |
| <b>B</b> | <b>Without any taste-related AE(s)</b> (N=10)             | Placebo                  | 1.07                | (0.85; 1.34)            | --                  | ---          |
|          | 20 mg                                                     |                          | 0.92                | (0.71; 1.20)            | 0.86                | (0.73; 1.01) |
|          | 80 mg                                                     |                          | 0.92                | (0.71; 1.20)            | 0.86                | (0.73; 1.01) |
|          | 150 mg                                                    |                          | 0.95                | (0.73; 1.24)            | 0.89                | (0.76; 1.04) |
|          | 250 mg                                                    |                          | 0.91                | (0.70; 1.19)            | 0.85                | (0.72; 0.99) |
| <b>C</b> | <b>With taste-related AE(s) with 250 mg BAY</b> (N=13)    | Placebo                  | 0.89                | (0.75; 1.03)            | --                  | --           |
|          | 20 mg                                                     |                          | 1.00                | (0.82; 1.25)            | 1.14                | (0.93; 1.39) |
|          | 80 mg                                                     |                          | 0.66                | (0.53; 0.81)            | 0.74                | (0.61; 0.90) |
|          | 150 mg                                                    |                          | 0.48                | (0.39; 0.59)            | 0.54                | (0.45; 0.66) |
|          | 250 mg                                                    |                          | 0.37                | (0.30; 0.45)            | 0.41                | (0.34; 0.50) |
| <b>D</b> | <b>Without taste-related AE(s) with 250 mg BAY</b> (N=10) | Placebo                  | 1.09                | (0.92; 1.27)            | --                  | --           |
|          | 20 mg                                                     |                          | 0.92                | (0.76; 1.14)            | 0.85                | (0.73; 1.00) |
|          | 80 mg                                                     |                          | 0.89                | (0.73; 1.10)            | 0.82                | (0.70; 0.96) |
|          | 150 mg                                                    |                          | 0.90                | (0.74; 1.10)            | 0.83                | (0.71; 0.97) |
|          | 250 mg                                                    |                          | 0.86                | (0.70; 1.05)            | 0.79                | (0.68; 0.93) |
| <b>E</b> | <b>With taste-related AE(s) with 150 mg BAY</b> (N=10)    | Placebo                  | 0.83                | (0.69; 0.99)            | --                  | --           |
|          | 20 mg                                                     |                          | 1.01                | (0.79; 1.29)            | 1.22                | (0.99; 1.52) |
|          | 80 mg                                                     |                          | 0.66                | (0.52; 0.84)            | 0.80                | (0.65; 0.99) |
|          | 150 mg                                                    |                          | 0.53                | (0.42; 0.68)            | 0.64                | (0.52; 0.80) |
|          | 250 mg                                                    |                          | 0.41                | (0.32; 0.52)            | 0.49                | (0.40; 0.61) |
| <b>F</b> | <b>Without taste-related AE(s) with 150 mg BAY</b> (N=13) | Placebo                  | 1.08                | (0.95; 1.23)            | --                  | --           |
|          | 20 mg                                                     |                          | 0.93                | (0.78; 1.09)            | 0.86                | (0.74; 0.98) |
|          | 80 mg                                                     |                          | 0.89                | (0.75; 1.06)            | 0.83                | (0.72; 0.95) |
|          | 150 mg                                                    |                          | 0.80                | (0.67; 0.94)            | 0.74                | (0.64; 0.85) |
|          | 250 mg                                                    |                          | 0.76                | (0.64; 0.90)            | 0.70                | (0.61; 0.81) |
| <b>G</b> | <b>With taste-related AE(s) with 80 mg BAY</b> (N=3)      | Placebo                  | 0.70                | (0.02; 24.11)           | --                  | --           |
|          | 20 mg                                                     |                          | 1.03                | (0.04; 38.98)           | 1.53                | (0.78; 3.21) |
|          | 80 mg                                                     |                          | 0.77                | (0.03; 28.39)           | 1.14                | (0.58; 2.43) |
|          | 150 mg                                                    |                          | 0.44                | (0.02; 15.84)           | 0.65                | (0.33; 1.38) |
|          | 250 mg                                                    |                          | 0.42                | (0.02; 15.65)           | 0.63                | (0.32; 1.32) |
| <b>H</b> | <b>Without taste-related AE(s) with 80 mg BAY</b> (N=20)  | Placebo                  | 0.97                | (0.83; 1.14)            | --                  | --           |
|          | 20 mg                                                     |                          | 0.98                | (0.80; 1.19)            | 1.00                | (0.86; 1.17) |
|          | 80 mg                                                     |                          | 0.79                | (0.65; 0.96)            | 0.81                | (0.70; 0.95) |
|          | 150 mg                                                    |                          | 0.70                | (0.57; 0.85)            | 0.72                | (0.61; 0.84) |
|          | 250 mg                                                    |                          | 0.59                | (0.49; 0.72)            | 0.61                | (0.52; 0.71) |

Total number of patients = 23.

**Table S 7: Cough severity (VAS): Subgroup analyses by occurrence of taste-related adverse events (Bayesian mixed model)**

|          | Dose                                                      | Comparison with baseline  |                          | Comparison with placebo    |                          |    |
|----------|-----------------------------------------------------------|---------------------------|--------------------------|----------------------------|--------------------------|----|
|          |                                                           | Change from baseline [mm] | 90% credible limits [mm] | Difference to placebo [mm] | 90% credible limits [mm] |    |
| <b>A</b> | <b>With any taste-related AE(s) (N=13)</b>                | Placebo                   | -5.96                    | (-13.06; 1.16)             | --                       | -- |
|          | 20 mg                                                     | -4.43                     | (-14.32; 5.00)           | 1.48                       | (-7.68; 10.54)           |    |
|          | 80 mg                                                     | -16.89                    | (-26.77; -7.18)          | -10.99                     | (-19.89; -1.85)          |    |
|          | 150 mg                                                    | -29.24                    | (-39.10; -19.46)         | -23.34                     | (-32.35; -14.23)         |    |
|          | 250 mg                                                    | -37.92                    | (-47.94; -28.07)         | -32.00                     | (-41.04; -22.93)         |    |
| <b>B</b> | <b>Without any taste-related AE(s) (N=10)</b>             | Placebo                   | 0.07                     | (-11.09; 10.70)            | --                       | -- |
|          | 20 mg                                                     | 1.33                      | (-10.73; 13.69)          | 1.25                       | (-5.70; 8.44)            |    |
|          | 80 mg                                                     | -4.47                     | (-16.48; 7.62)           | -4.47                      | (-11.53; 2.61)           |    |
|          | 150 mg                                                    | -0.67                     | (-12.64; 11.27)          | -0.75                      | (-7.87; 6.13)            |    |
|          | 250 mg                                                    | -4.54                     | (-16.48; 7.79)           | -4.50                      | (-11.41; 2.39)           |    |
| <b>C</b> | <b>With taste-related AE(s) with 250 mg BAY (N=13)</b>    | Placebo                   | -2.03                    | (-9.62; 5.33)              | --                       | -- |
|          | 20 mg                                                     | -4.25                     | (-14.42; 5.48)           | -2.17                      | (-11.56; 7.08)           |    |
|          | 80 mg                                                     | -15.37                    | (-25.35; -5.33)          | -13.34                     | (-22.64; -3.78)          |    |
|          | 150 mg                                                    | -28.83                    | (-38.75; -18.90)         | -26.73                     | (-36.05; -17.37)         |    |
|          | 250 mg                                                    | -35.69                    | (-45.90; -25.76)         | -33.64                     | (-43.04; -24.66)         |    |
| <b>D</b> | <b>Without taste-related AE(s) with 250 mg BAY (N=10)</b> | Placebo                   | -2.83                    | (-14.63; 8.75)             | --                       | -- |
|          | 20 mg                                                     | 0.20                      | (-12.77; 13.70)          | 3.05                       | (-4.61; 10.85)           |    |
|          | 80 mg                                                     | -7.39                     | (-20.33; 5.48)           | -4.58                      | (-12.16; 2.98)           |    |
|          | 150 mg                                                    | -4.06                     | (-17.24; 8.88)           | -1.23                      | (-8.80; 6.28)            |    |
|          | 250 mg                                                    | -9.87                     | (-23.09; 3.09)           | -7.02                      | (-14.70; 0.53)           |    |
| <b>E</b> | <b>With taste-related AE(s) with 150 mg BAY (N=10)</b>    | Placebo                   | 0.65                     | (-7.91; 9.38)              | --                       | -- |
|          | 20 mg                                                     | -1.79                     | (-13.87; 9.46)           | -2.58                      | (-13.98; 8.42)           |    |
|          | 80 mg                                                     | -14.86                    | (-26.65; -3.14)          | -15.62                     | (-26.77; -4.26)          |    |
|          | 150 mg                                                    | -26.98                    | (-38.63; -15.23)         | -27.66                     | (-38.68; -16.50)         |    |
|          | 250 mg                                                    | -34.47                    | (-46.31; -22.94)         | -35.22                     | (-46.53; -24.19)         |    |
| <b>F</b> | <b>Without taste-related AE(s) with 150 mg BAY (N=13)</b> | Placebo                   | -6.12                    | (-16.06; 3.55)             | --                       | -- |
|          | 20 mg                                                     | -2.47                     | (-13.68; 8.57)           | 3.61                       | (-3.14; 10.62)           |    |
|          | 80 mg                                                     | -9.48                     | (-20.68; 1.52)           | -3.29                      | (-10.23; 3.59)           |    |
|          | 150 mg                                                    | -11.19                    | (-22.34; 0.00)           | -5.00                      | (-11.92; 1.87)           |    |
|          | 250 mg                                                    | -16.85                    | (-28.08; -5.65)          | -10.64                     | (-17.54; -3.84)          |    |
| <b>G</b> | <b>With taste-related AE(s) with 80 mg BAY (N=3)</b>      | Placebo                   | -3.21                    | (-74.07; 75.42)            | --                       | -- |
|          | 20 mg                                                     | -5.31                     | (-76.79; 74.16)          | -2.14                      | (-15.37; 11.05)          |    |
|          | 80 mg                                                     | -32.57                    | (-104.0; 45.17)          | -29.42                     | (-42.54; -16.03)         |    |
|          | 150 mg                                                    | -51.87                    | (-123.9; 25.91)          | -48.58                     | (-61.65; -35.36)         |    |
|          | 250 mg                                                    | -61.58                    | (-132.4; 17.23)          | -58.44                     | (-71.55; -45.04)         |    |
| <b>H</b> | <b>Without taste-related AE(s) with 80 mg BAY (N=20)</b>  | Placebo                   | -3.75                    | (-10.63; 2.75)             | --                       | -- |
|          | 20 mg                                                     | -1.69                     | (-9.92; 6.61)            | 2.15                       | (-4.12; 8.41)            |    |
|          | 80 mg                                                     | -7.98                     | (-16.23; 0.06)           | -4.18                      | (-10.52; 2.06)           |    |
|          | 150 mg                                                    | -12.68                    | (-20.98; -4.68)          | -8.97                      | (-15.27; -2.67)          |    |
|          | 250 mg                                                    | -18.66                    | (-26.73; -10.51)         | -14.79                     | (-21.12; -8.55)          |    |

Total number of patients = 23.

**Figure S 1: Plasma concentration-time curves for filapixant (BAY1902607) after multiple administrations**

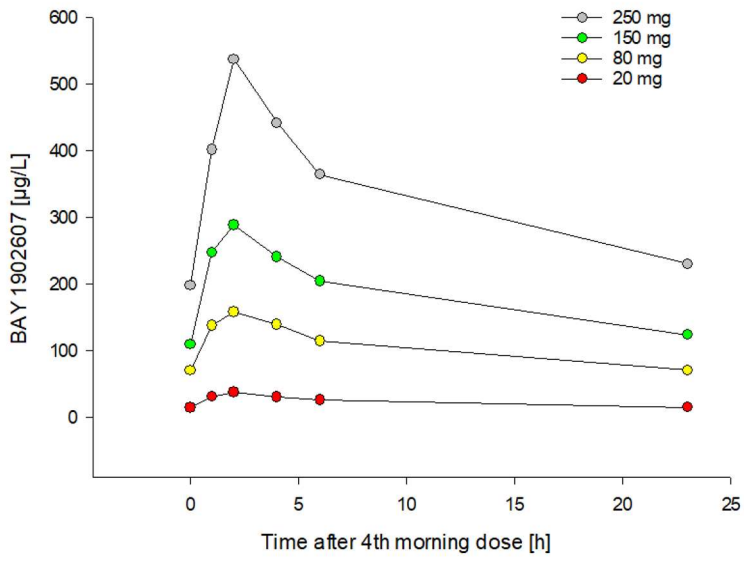

Total number of patients = 23.
