# Supplementary material for: The P2X3 receptor antagonist filapixant in patients with refractory chronic cough: a randomized controlled trial
Source: PubMed Central journal article supplement (PMC10088222; doi:10.1186/s12931-023-02384-8), 2023-04-11
Supplement: 12931_2023_2384_MOESM4_ESM.pdf [file 12931_2023_2384_MOESM4_ESM.pdf]

C. Friedrich, K. Francke, S. S. Birring, J. W. K. van den Berg, P. A. Marsden, L. McGarvey, A. M. Turner, P. Wielders, I. Gashaw, S. Klein, A. Morice

## **The P2X3 receptor antagonist filapixant in patients with refractory chronic cough – a randomized trial**

*Respiratory Research 2023*

### **Additional File 4**

## **List of independent ethics committees consulted**

For study centers in the United Kingdom:

North West - Greater Manchester Central REC  
HRA Centre Manchester  
3rd Floor  
Barlow House  
M1 3DZ Manchester  
United Kingdom

For study centers in The Netherlands:

Isala  
METC, Isala  
Gebouw Mondriaan, kamer 0.25  
Postbus 10400  
8000 GK ZWOLLE  
The Netherlands
